# Supplementary material
Source: ML conference proceedings conference paper supplement (https://openaccess.thecvf.com/content/WACV2024/html/Jamal_M33D_Learning_3D_WACV_2024_paper.html)
Supplement: Supplementary file 1 [file Jamal_M33D_Learning_3D_WACV_2024_supplemental.pdf]

## Appendices

### A. Datasets

**Video Understanding.** For video action recognition, we pre-train and evaluate the model on UCF-101 [57] which contains 9.5k/3.5k train/val videos. For surgical video action detection, we pre-train and evaluate the model on OR-AR [35] which consists of 820 long videos captured in surgical operating rooms. All videos have 9 temporal workflow phase labels.

**Image Understanding.** For image understanding tasks, we pre-train the model on ScanNet [20] which contains 2.5M RGB-D frames from 1513 video sequences. For evaluation, we use ScanNet and NYUv2 [49]. NYUv2 contains 1449 densely labeled images from indoor scenes captured with Microsoft Kinect RGB-D camera. We use the official split of 795 images in training set and 654 images in test set.

### B. Additional Implementation Details

#### B.1. Network Architecture

**Video Understanding.** We follow the network architecture presented in VideoMAE [60] for video based pre-training. The encoder part of the network is vision-transformer base (ViT-B) while the decoder consists of 4 blocks with six multi-head attentions in each. The width of the decoder is set to half of the encoder dimension i.e. 384-d. We use two fully connected layers (one for each modality) on top of the decoder for reconstruction. During fine-tuning, we remove the decoder and add the fully connected layer for prediction. Specifically for surgical video action detection, we follow the fine-tuning method in [35, 56]. For evaluation, we fine-tune the model in two stages. In the first stage, we add a fully connected layer on top of the encoder for predicting clip-wise phases. In the second stage, we first extract the features from the encoder and then train a temporal model (Bi-GRU) for detecting phases in a full video.

**Image Understanding.** We follow MAE [33] for the network design. Our modality-specific encoders are based on ViT-B while the decoder part consists of 8 blocks with 16 multi-head attentions in each block. The width is set to 512. Similarly, we use two fully-connected layers (one for each modality) on top of the decoder for reconstruction. For fine-tuning, we mostly follow MultiMAE [5] for task specific head. More specifically, we use segmentation head based on ConvNeXt architecture [46] and depth-estimation head based on DPT [55].

#### B.2. Pre-training and Fine-tuning Details

For video understanding, we report the pre-training setting in Table 9 and the fine-tuning setting in Table 10. More-

over, we report the pre-training setting on ScanNet in Table 12 and the transfer setting for semantic segmentation and depth estimation task in Table 13 and Table 14 respectively.

| Configuration          | OR-AR [35] | UCF-101 [57]              |
|------------------------|------------|---------------------------|
| Optimizer              |            | AdamW                     |
| Optimizer betas        |            | {0.9, 0.95}               |
| Base learning rate     | 1e-4       | 1e-3                      |
| Weight decay           |            | 5e-2                      |
| Learning rate schedule |            | cosine decay              |
| gradient clipping      | 0.02       | None                      |
| Warmup epochs          |            | 40                        |
| Epochs                 | 1600       | 100 or 800 (from scratch) |
| Flip augmentation      | True       | True                      |
| Augmentation           |            | MultiScaleCrop            |
| Num of Frames          |            | 16                        |
| sampling rate          |            | 4.0                       |
| $\alpha$               | 1.0        | 1.0                       |
| $\beta$                | 0.5        | 0.1                       |
| $\gamma$               | 0.2        | 0.01                      |
| $\eta$                 | 0.1        | 0.01                      |

Table 9. Pre-training setting on OR-AR [35] and UCF-101 [57] datasets.

| Configuration                | OR-AR [35] | UCF-101 [57] |
|------------------------------|------------|--------------|
| Optimizer                    |            | AdamW        |
| Optimizer betas              |            | {0.9, 0.95}  |
| Base learning rate           | 6e-4       | 1e-3         |
| Weight decay                 |            | 5e-2         |
| Learning rate schedule       |            | cosine decay |
| Warmup epochs                |            | 5            |
| Epochs                       | 75         | 100          |
| Flip augmentation            | True       | True         |
| Mixup                        | None       | 0.8          |
| CutMix                       | None       | 1.0          |
| drop path                    | 0.1        | 0.2          |
| drop out                     | 0.0        | 0.5          |
| Layer-wise lr decay          | 0.65       | 0.70         |
| Temporal Model learning rate | 1e-3       | None         |
| Temporal Model Epochs        | 15         | None         |

Table 10. Fine-tune setting on OR-AR [35], UCF-101 [57] datasets.

| Strategy and Ratio     | OR-AR [35] | UCF-101 [57] | ScanNet [20] |
|------------------------|------------|--------------|--------------|
| RGB Masking strategy   | Tube       | SurgMAE [41] | Random       |
| RGB Masking ratio      | 0.9        | 0.9          | 0.8          |
| Depth Masking strategy | Tube       | Random       | Random       |
| Depth Masking ratio    | 0.9        | 0.9          | 0.8          |

Table 11. Masking strategies during pre-training.

#### B.3. Masking Strategy

Table 11 shows the different masking strategies for RGB-D modalities during pre-training.

| Configuration          | ScanNet [20]               |
|------------------------|----------------------------|
| Optimizer              | AdamW                      |
| Optimizer betas        | {0.9, 0.95}                |
| Base learning rate     | 1e-4                       |
| Weight decay           | 5e-2                       |
| Learning rate schedule | cosine decay               |
| Stage-1 epochs         | 20                         |
| Stage-2 epochs         | 100                        |
| Augmentation           | Gaussian Blur, ColorJitter |
| $\alpha$               | 0.1                        |
| $\beta$                | 1.0                        |

Table 12. Pre-training setting on ScanNet [20].

| Configuration          | ScanNet [20] | NYUv2 [49] |
|------------------------|--------------|------------|
| Optimizer              | AdamW        |            |
| Optimizer betas        | {0.9, 0.999} |            |
| Base learning rate     | 1e-4         |            |
| Layer-wise lr decay    | 0.75         |            |
| Weight decay           | 5e-2         |            |
| Learning rate schedule | cosine decay |            |
| Warmup epochs          | 1            |            |
| Warmup learning rate   | 1e-6         |            |
| Drop path              | 0.1          |            |
| Epochs                 | 50           | 200        |
| Input resolution       | 240 x 320    | 640 x 640  |
| Color jitter           | ✗            | ✓          |
| RandomGaussianBlur     | ✓            | ✗          |
| RandomHorizontalFlip   | ✓            | ✗          |

Table 13. Fine-tune setting on ScanNet [20] and NYUv2 [49] for 2D semantic segmentation.

| Configuration          | NYUv2 [49]               |
|------------------------|--------------------------|
| Optimizer              | AdamW                    |
| Optimizer betas        | {0.9, 0.999}             |
| Base learning rate     | 1e-4                     |
| Weight decay           | 1e-4                     |
| Learning rate schedule | cosine decay             |
| Warmup epochs          | 100                      |
| Warmup learning rate   | 1e-6                     |
| Epochs                 | 2000                     |
| Batch Size             | 128                      |
| Layer-wise lr decay    | 0.75                     |
| Input resolution       | 256 x 256                |
| Augmentation           | RandomCrop, Color jitter |

Table 14. Fine-tune setting for NYUv2 [49] depth estimation.
